# Supplementary material for: Hip Osteoarthritis and Physical Workload: Influence of Study Quality on Risk Estimations—A Meta-Analysis of Epidemiological Findings
Source: MDPI journal article supplement (doi:10.3390/ijerph16030322), 2019-01-24

# **File S3. Forest plots of all meta-analyses carried out for Table 5 (males)**

## **Heavy lifting/load handling and hip osteoarthritis among males (see Table 5)**

### **a. All prevalence studies, male, n=8**

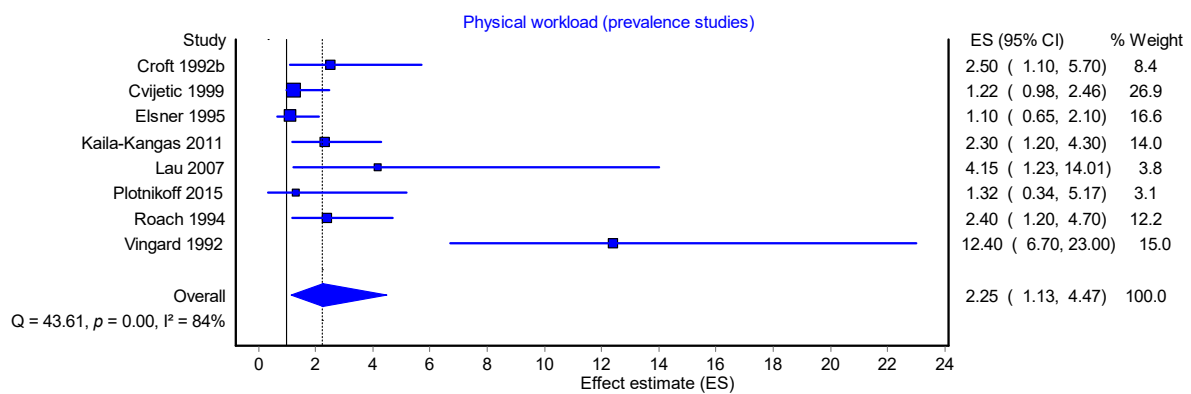

### **b. Prevalence studies, male, ExpoScore=all, DiagScore=3, n=6**

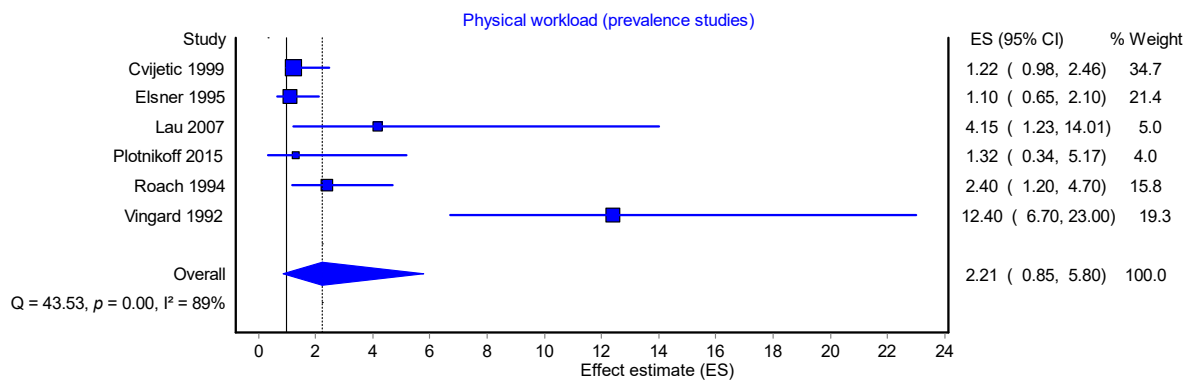

c. Prevalence studies, male, ExpoScore $\geq$ 3, DiagScore=all, n=4

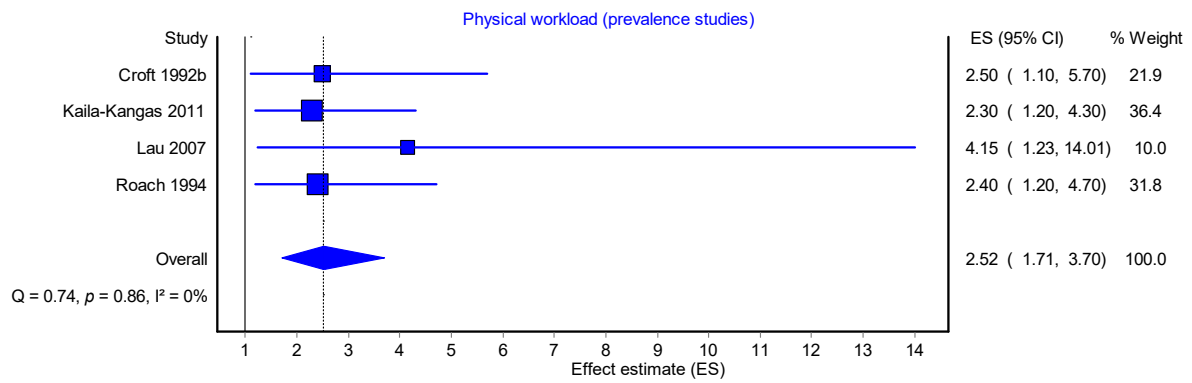

d. Prevalence studies, male, ExpoScore $\geq$ 3, DiagScore=3, n=2)

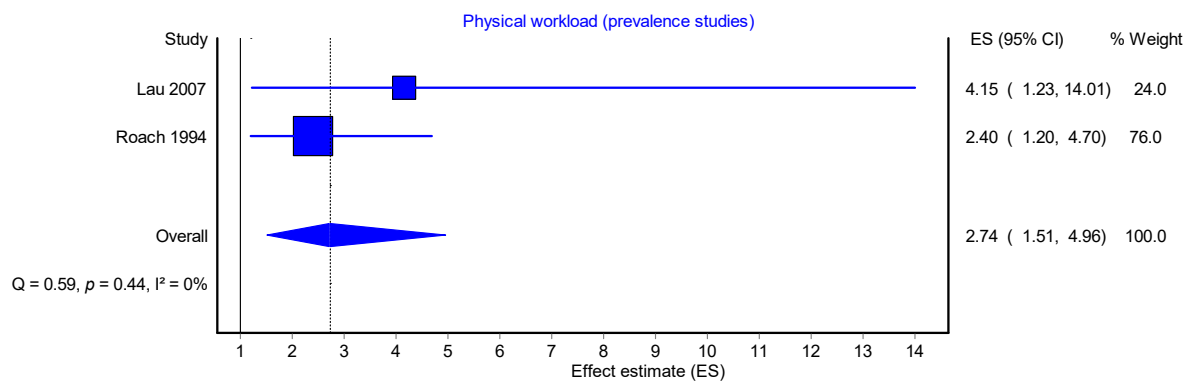

e. All case-control studies, male, n=2

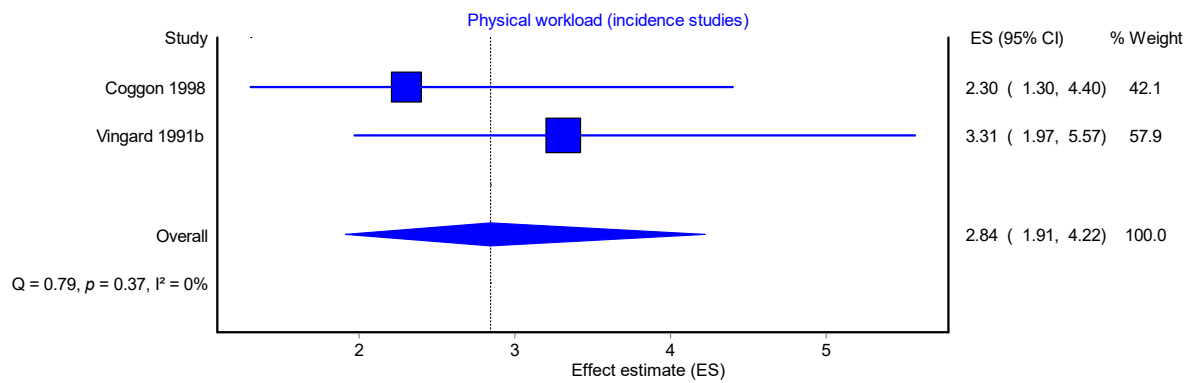

f. All cohort studies, male, n=3

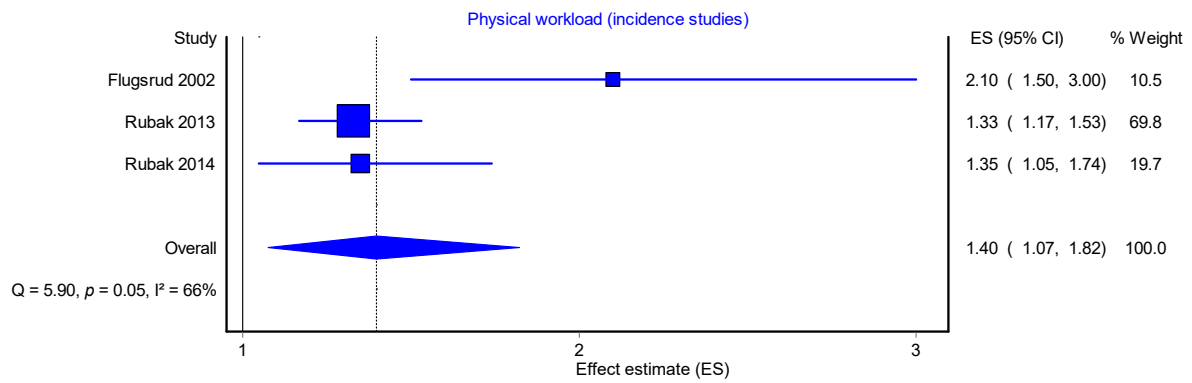

g. Cohort studies, male, ExpoScore $\geq$ 3, DiagScore=3, n=2

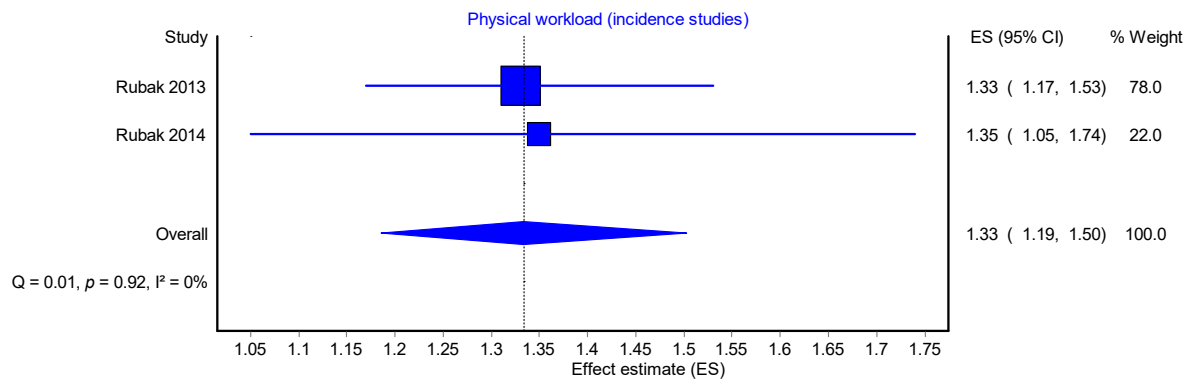

## Farming and hip osteoarthritis among males (see Table 5)

### a. All prevalence studies, male, n=7

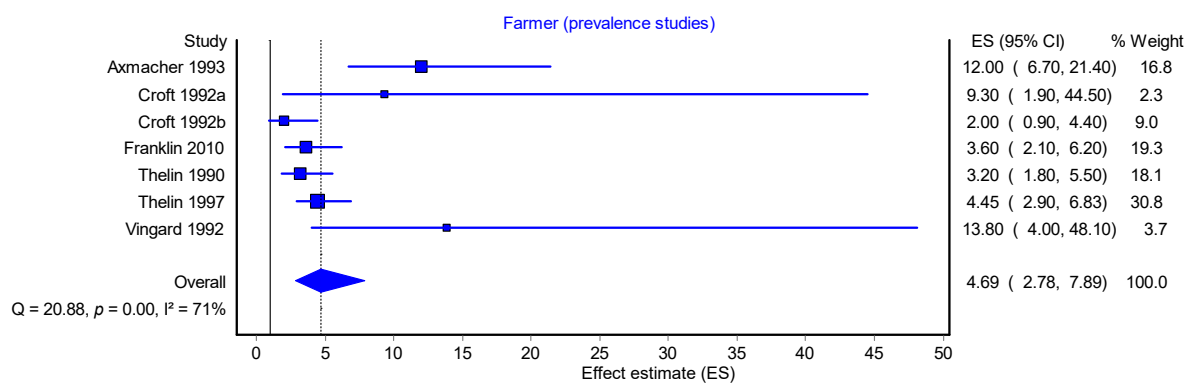

### b. Prevalence studies, male, ExpoScore=1-2, DiagScore=1-2, n=4

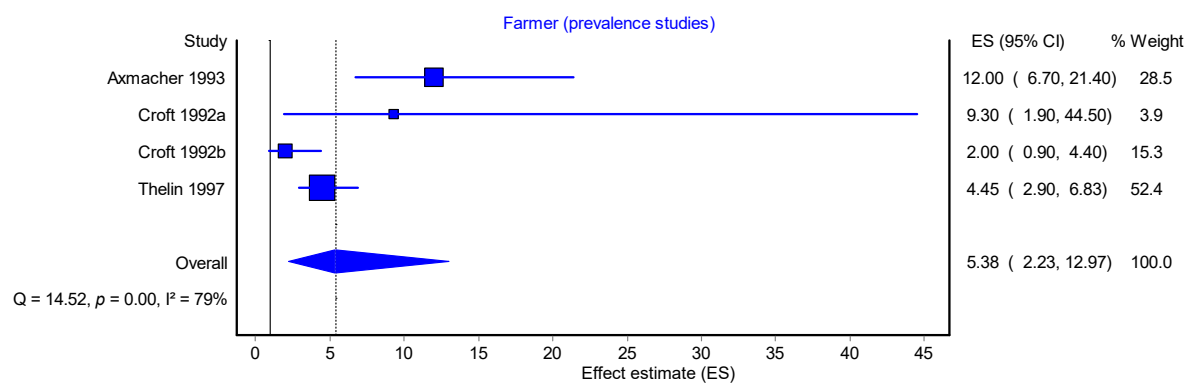

### c. Prevalence studies, male, ExpoScore=1-2, DiagScore=3, n=3

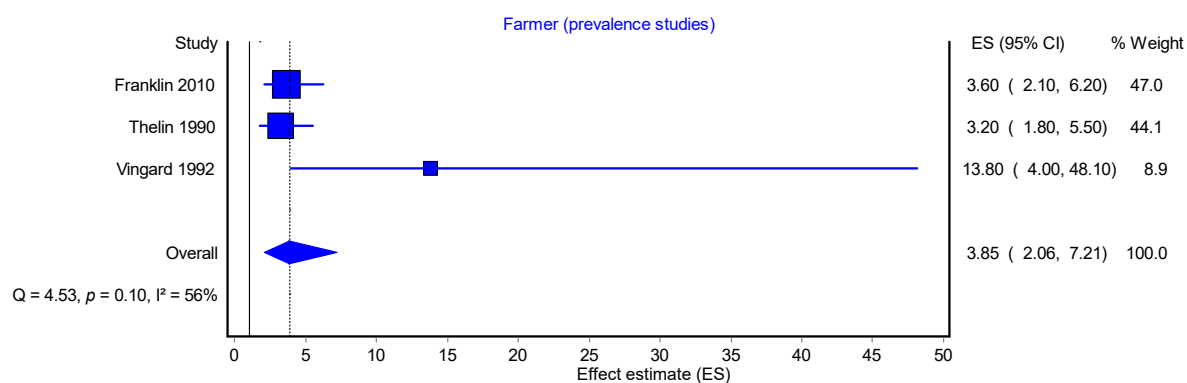

d. All cohort studies, male, n=5

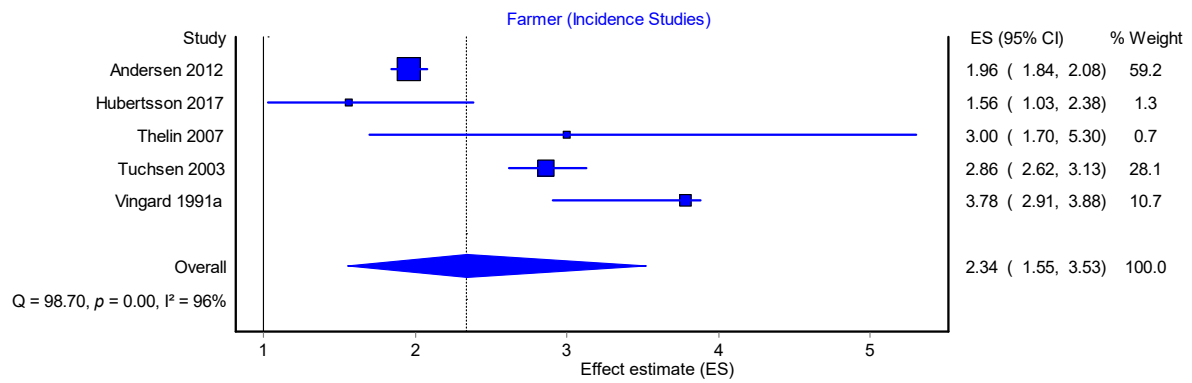

e. Cohort studies, DiagScore=3, n=4

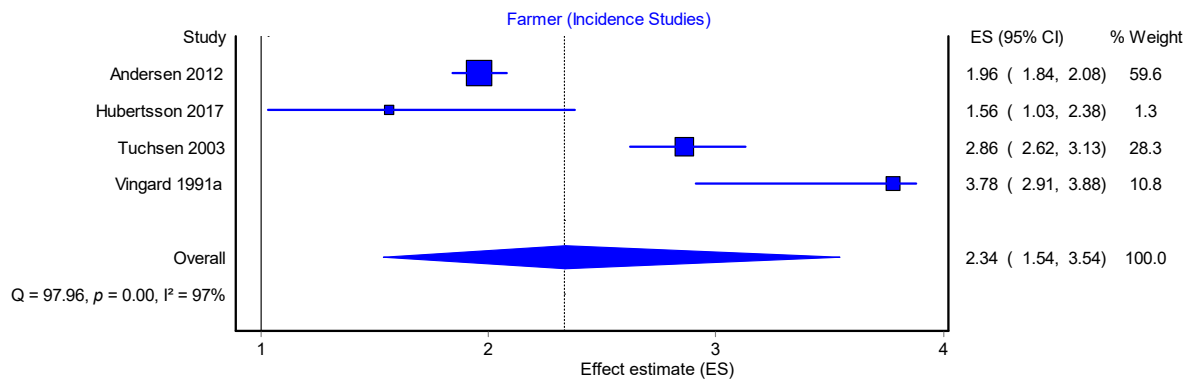

Supplement: s1 [file s1]
