# Supplementary material for: Hip Osteoarthritis and Physical Workload: Influence of Study Quality on Risk Estimations—A Meta-Analysis of Epidemiological Findings
Source: MDPI journal article supplement (doi:10.3390/ijerph16030322), 2019-01-24

## File S2. Forest plots of all meta-analyses carried out for Table 4 (all studies)

### Heavy lifting/load handling and hip osteoarthritis (see Table 4)

#### a. All prevalence studies, n=13

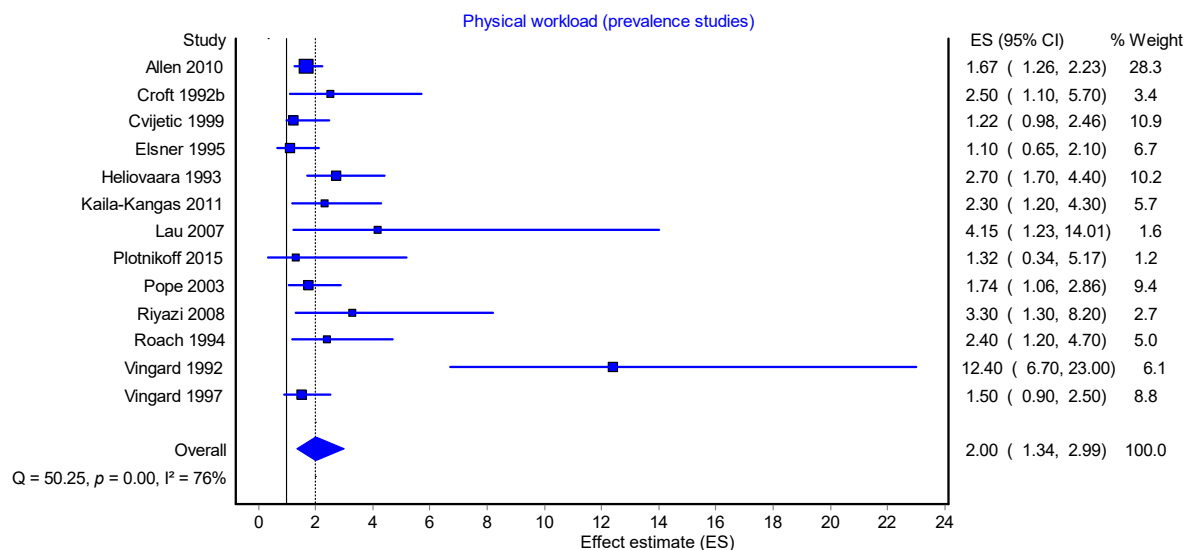

#### b. Prevalence studies, ExpoScore=all, DiagScore=3, n=9

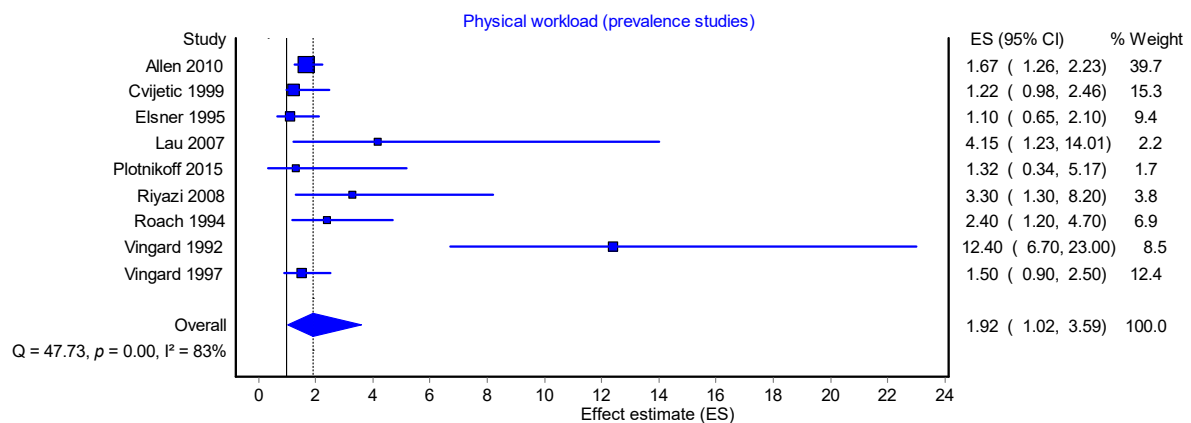

c. Prevalence studies, ExpoScore $\geq$ 3, DiagScore=all, n=6)

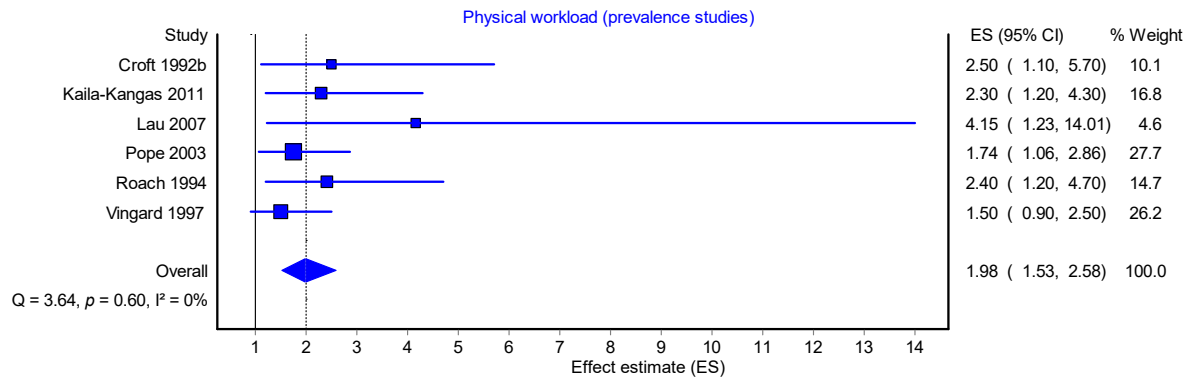

d. Prevalence studies, ExpoScore $\geq$ 3, DiagScore=3, n=3)

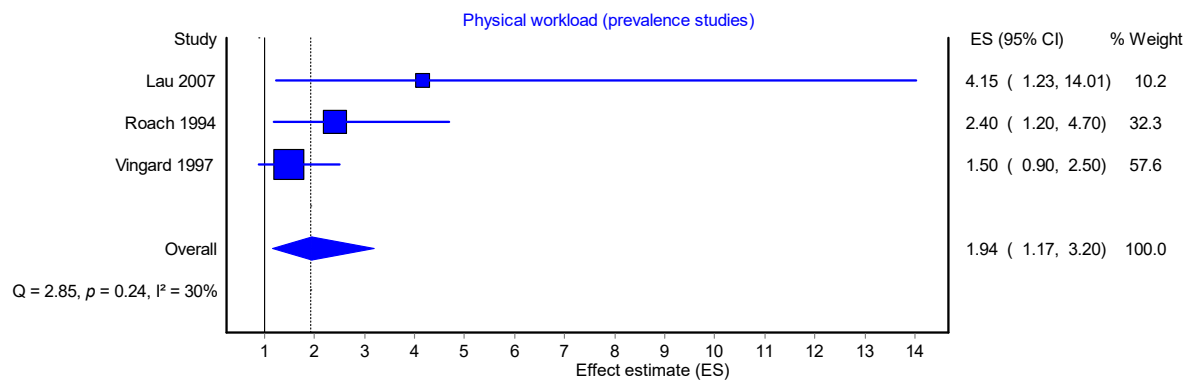

e. All case-control studies, n=3

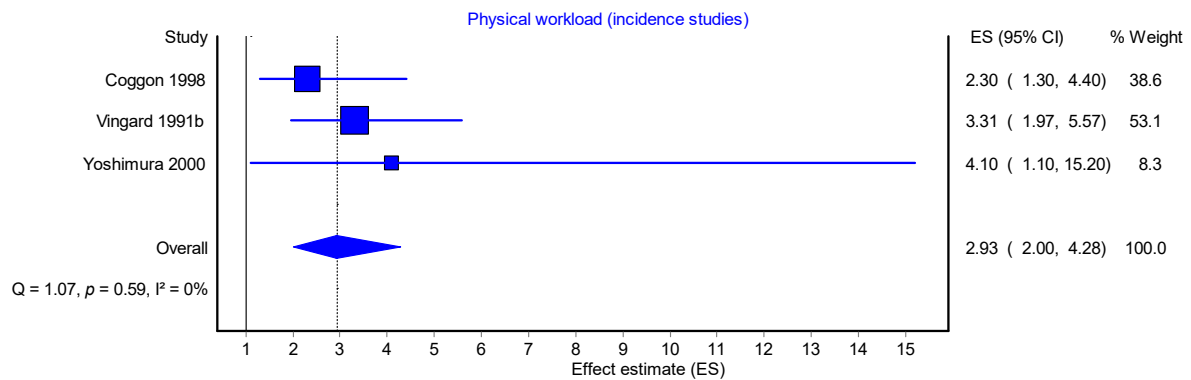

f. All cohort studies, n=6

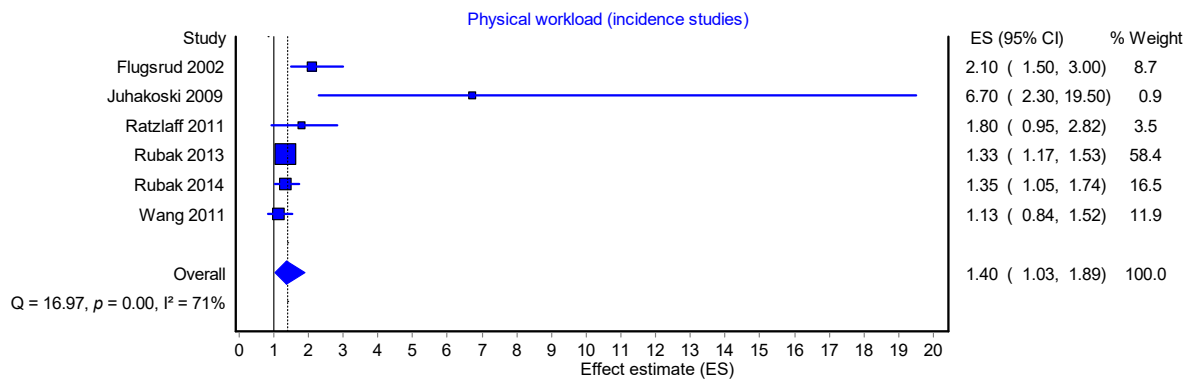

g. Cohort studies, ExpoScore=all, DiagScore=3, n=5

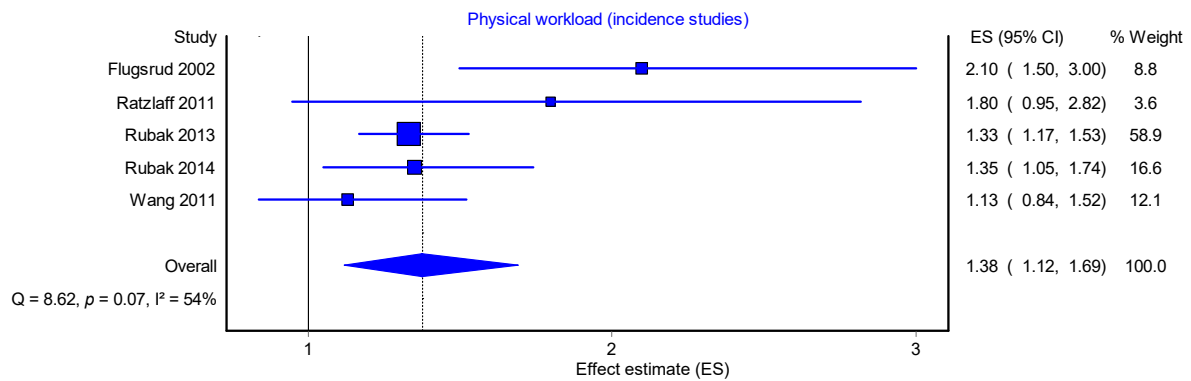

h. Cohort studies, ExpoScore $\geq$ 3, DiagScore=3, n=2

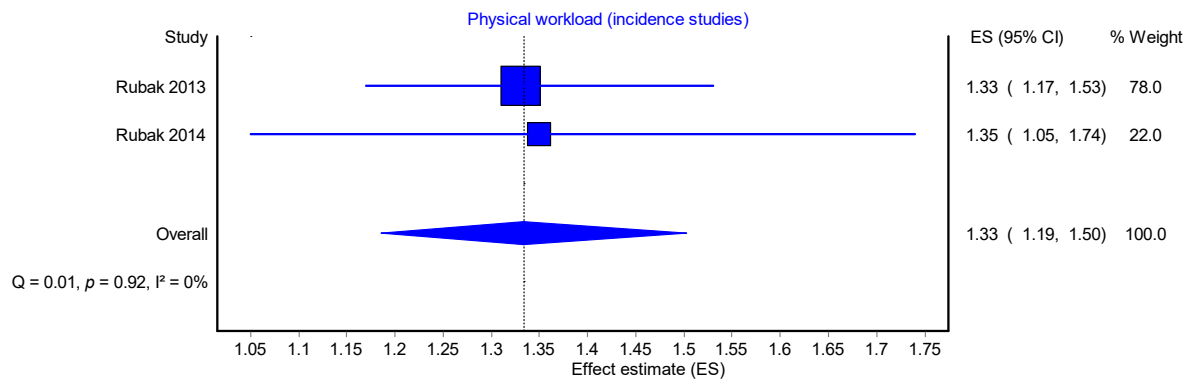

## Farming and hip osteoarthritis (see Table 4)

### a. All prevalence studies, n=8

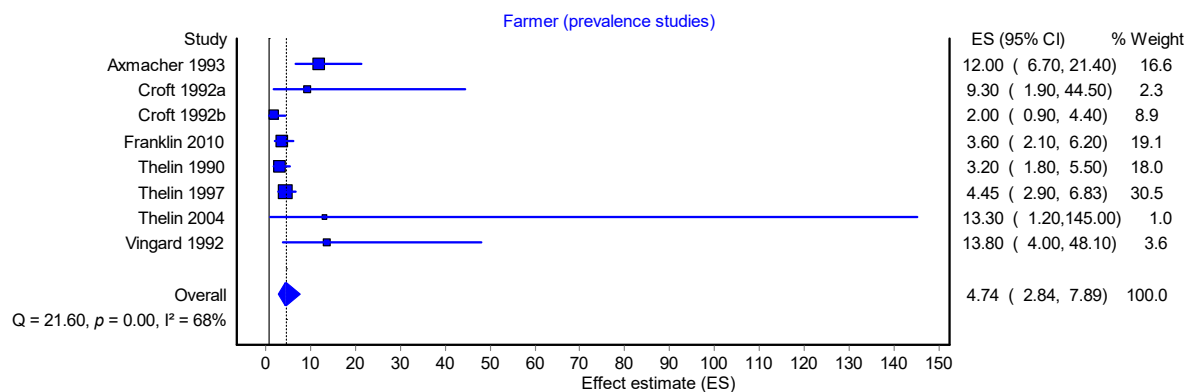

### b. Prevalence studies, ExpoScore=1-2, DiagScore=1-2, n=4

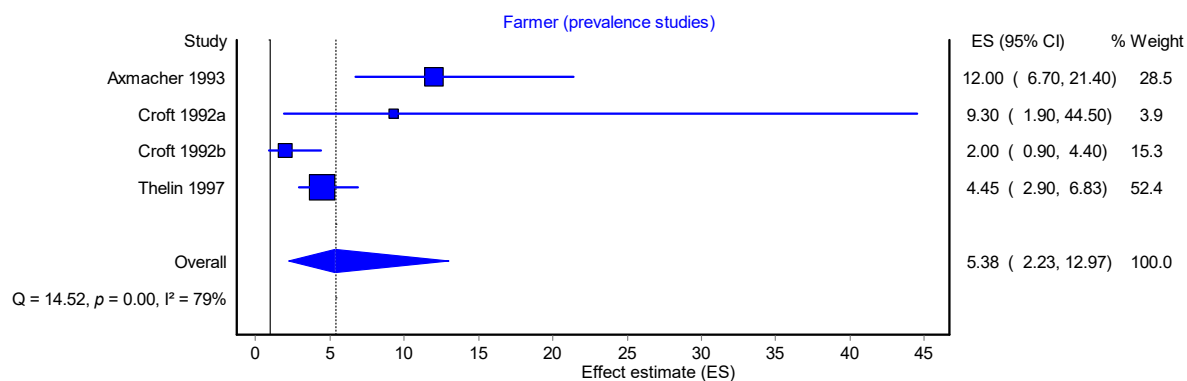

### c. Prevalence studies, ExpoScore=1-2, DiagScore=3, n=4

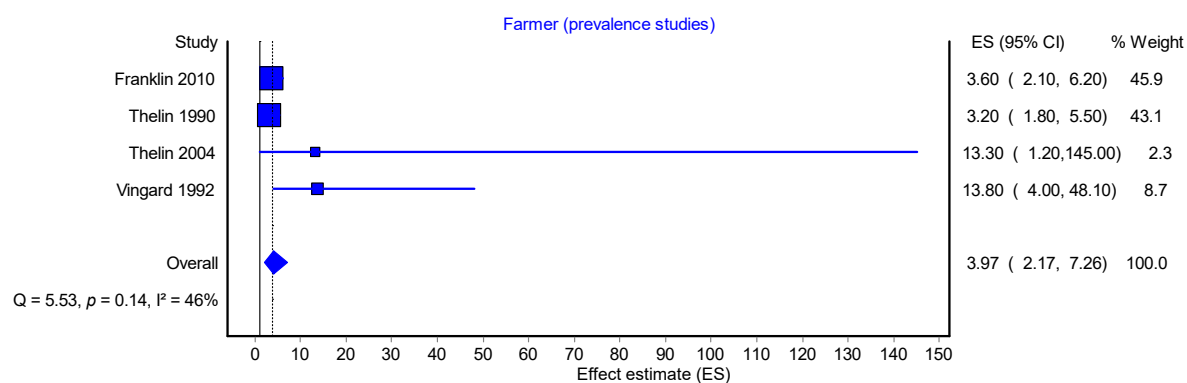

d. All cohort studies, n=5

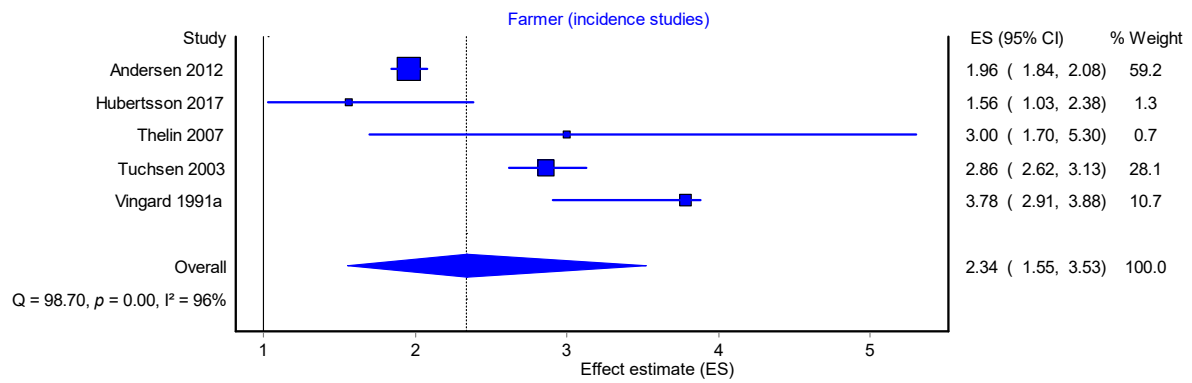

e. Cohort studies, DiagScore=3, n=4

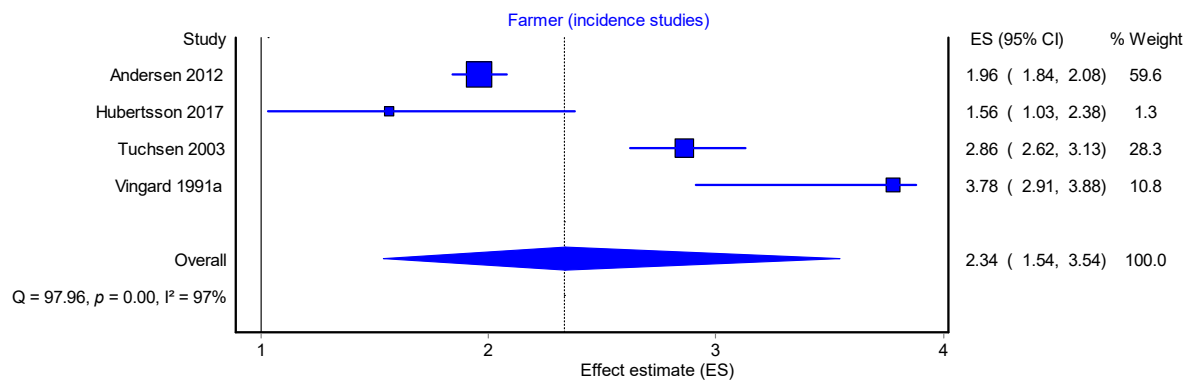

Supplement: s1 [file s1]
