# Supplementary material for: Hip Osteoarthritis and Physical Workload: Influence of Study Quality on Risk Estimations—A Meta-Analysis of Epidemiological Findings
Source: MDPI journal article supplement (doi:10.3390/ijerph16030322), 2019-01-24
Supplement: s1 [file s1]

## **File S1. Literature search strategy**

To improve precision and recall, test searches were conducted. Tests included synonym controls, check and comparison of MESH terms and terms in EMBASE basic index. Searches were limited to English and German language articles.

Literature with publication date 2010 - 2017 was searched.

### **PubMed:**

17.5.2018

- #1    Search "Osteoarthritis, Hip"[Mesh]
- #2    Search occupational?
- #3    Search lifting or carrying
- #4    Search farmer? or farming
- #5    Search #2 OR #3 OR #4
- #6    Search #1 AND #5
- #7    Search ("2010/01/01"[Date - Publication] : "2017/12/31"[Date - Publication])
- #8    Search #6 AND #7

N hits = 34

### **EMBASE:**

7.5.2018, Host STN

- L1    S HIP OSTEOARTHRITIS
- L2    S COXARTHROSIS
- L3    S COXARTHROSES
- L4    S L1 OR L2 OR L3
- L5    S INDUSTRIAL MEDICINE
- L6    S OCCUPATION?

L7     S L5 OR L6

L8     S L4 AND L7

L9     S L8 AND 2010-2017/PY

L10    S L9 NOT THERAPY

L11    S L10 NOT SURGERY

N hits = 53

**Cochrane Work:**

26.4.2018, <http://work.cochrane.org/>

Hand searching

N = 0

**Google Scholar:**

2.-5.5.2018, <https://scholar.google.com/>

Hand searching was conducted with the following terms in different combinations:

Hip osteoarthritis, coxarthrosis, occupation, work, lifting, dose-response, study.

All hits were studies already known.
