# Supplementary material for: Hip Osteoarthritis and Physical Workload: Influence of Study Quality on Risk Estimations—A Meta-Analysis of Epidemiological Findings
Source: MDPI journal article supplement (doi:10.3390/ijerph16030322), 2019-01-24
Supplement: s1 [file s1]

**Table S1.** Excluded studies, reason for exclusion and references

| Author, year     | Study design                           | Reason for exclusion                                                                                                                                                                     |
|------------------|----------------------------------------|------------------------------------------------------------------------------------------------------------------------------------------------------------------------------------------|
| Akesson 1999     | Cross sectional and prospective cohort | Low physical load (dental professions), only symptoms as outcome. Focus on disorders of neck and upper extremities, physically low workload, no quantitative data of exposure.           |
| Andrianakos 2006 | Cross sectional prevalence             | No physical workload                                                                                                                                                                     |
| Bieleman 2010    | Cross sectional                        | No physical workload                                                                                                                                                                     |
| Cho 2015         | Cross sectional                        | No physical workload                                                                                                                                                                     |
| Cleveland 2013   | Cross sectional                        | No physical workload                                                                                                                                                                     |
| Cooper 1998      | Case control                           | No physical workload.<br>Occupational aspects: s. Coggon 1998                                                                                                                            |
| Cumming 1993     | Case control                           | No physical workload                                                                                                                                                                     |
| Cunningham 1992  | Case control                           | Inadequate information to allow fair assessment of quality.<br>Poor design, only farmer as job title.                                                                                    |
| Dahaghin 2005    | Cross sectional                        | No physical workload                                                                                                                                                                     |
| DeZwart 1997     | Cohort                                 | Only musculoskeletal symptoms as outcome.<br>No quantitative data of exposure, no comparison between exposed and not exposed.                                                            |
| Drawer 2001      | Cross sectional                        | Cases ascertained by self-reported prior coxarthrosis diagnosis. No physical workload.                                                                                                   |
| Goekoop 2011     | Cross sectional                        | Not relevant. The study population are very old people (>85 years), who has very good functions. Strong selection bias!                                                                  |
| Gomez 2003       | Cross sectional                        | Only self-reported joint pain as outcome                                                                                                                                                 |
| Gouttebarga 2015 | Review                                 | Focus on former athletes                                                                                                                                                                 |
| Holmberg 2002    | Case control                           | Only hip pain or surgery as outcome, no exposure data.                                                                                                                                   |
| Jacobsson 1987   | Cross sectional                        | Not relevant (no risk assessment).<br>Weaknesses. Inadequate exposure definition, likelihood of recall bias, lack of consideration of potential confounders, and cross-sectional design. |

| Author, year   | Study design    | Reason for exclusion                                                                                                                                                                                           |
|----------------|-----------------|----------------------------------------------------------------------------------------------------------------------------------------------------------------------------------------------------------------|
| Jacobsen 2004b | Cohort          | Not relevant, study only among subjects without hip osteoarthritis. Joint spaces were measured, but criteria for diagnosing coxarthrosis were not specified. See Jacobsen 2004a (included in this analysis).   |
| Jacobsen 2005a | Cross sectional | See Jacobsen 2004a (included in this analysis).                                                                                                                                                                |
| Jacobsen 2005b | Case control    | Not relevant, Patients with hip dysplasia, not hip osteoarthritis, no exposure assessment.                                                                                                                     |
| Järvholm 2008  | Cohort          | Poor methodology. Not relevant. Exposure information limited only to job title. However there is no job title for farmer.                                                                                      |
| Juhakoski 2008 | Cross sectional | Only physical function as outcome.                                                                                                                                                                             |
| Keskimäki 1996 | Cross sectional | Socioeconomic difference of surgery, no exposure data                                                                                                                                                          |
| Kettunen 2001  | Cross sectional | Cases ascertained by self-reported prior coxarthrosis diagnosis. Same subject as those in Kujala 2014. No physical workload.                                                                                   |
| Kim 2014       | Cross sectional | No physical workload                                                                                                                                                                                           |
| Kujala 1994    | Cohort          | Same subjects as in Kettunen 2001. No physical workload.                                                                                                                                                       |
| Lau 2000       | Case control    | See Lau 2007 (included in this analysis).                                                                                                                                                                      |
| Lawrence 1966  | Case control    | Outcome was rheumatoid arthritis, not coxarthrosis. No physical workload.                                                                                                                                      |
| Lemasters 1998 | Cross sectional | Study on prevalence of musculoskeletal disorders, no data on coxarthrosis.                                                                                                                                     |
| Lindberg 1984  | Cross sectional | Unquantified exposures, no risk estimates                                                                                                                                                                      |
| Litwic 2013    | Review          | Exposure not issued                                                                                                                                                                                            |
| Marti 1989     | Cohort          | Observational study. Exposures due to sports (recreational or professional) rather than “standard” occupations. No physical workload.                                                                          |
| Olsen 1994     | Case control    | See Vingard 1991b (included in this analysis).                                                                                                                                                                 |
| Rapala 2015    | Cross sectional | Not relevant, only patients with osteoarthritis. No healthy control person.                                                                                                                                    |
| Reijman 2005   | Cohort          | Study focused on progression from mild to severe coxarthrosis, not etiology of coxarthrosis. No risk assessment.                                                                                               |
| Rossignol 2003 | Cross sectional | Not relevant, no exposure assessment.<br><br>Weaknesses. Lack of precise diagnostic criteria. Lack of information on potential confounders other than age and gender. Lack of quantitative exposure estimates. |

| Author, year   | Study design    | Reason for exclusion                                                                                                                                        |
|----------------|-----------------|-------------------------------------------------------------------------------------------------------------------------------------------------------------|
| Rossignol 2005 | Cross sectional | Not relevant, no diagnosis information? Weaknesses. Use of prevalent cases. Lack of details on hip OA diagnosis. Limited, qualitative exposure definitions. |
| Sandmark 2000  | Cross sectional | Not relevant for topic. Cases ascertained by self-reported prior coxarthrosis diagnosis.                                                                    |
| Schmitt 2004   | Cross sectional | Exposures due to sports (recreational or professional) rather than “standard” occupations, small sample size, no exposure assessment.                       |
| Schmitt 2006   | Cross sectional | Exposures due to sports (recreational or professional) rather than “standard” occupations; small sample size, no exposure assessment.                       |
| Seok 2017      | Cross sectional | Not relevant, no exposure information.                                                                                                                      |
| Shepard 2003   | Cross sectional | Cases ascertained by self-reported prior coxarthrosis diagnosis, no exposure assessment, injury as confounder?                                              |
| Sobti 1997     | Cross sectional | Study focus on pain syndromes and stiffness.                                                                                                                |
| Teichtahl 2015 | Cohort          | Not relevant, outcome of study is not hip osteoarthritis.                                                                                                   |
| Teitz 1998     | Cohort          | Joint spaces were measured, but criteria for diagnosing coxarthrosis were not specified, no exposure assessment.                                            |
| Tepper 1993    | Case control    | Factors associated with hip osteoarthritis, but no data on occupation.                                                                                      |
| Toren 2002     | Cross sectional | No data on coxarthrosis, just quantification of time of tractor driving. Focus on vibration as exposure.                                                    |
| Typpö 1995     | Cross sectional | Unclear exposure categories. Lack of risk estimates.                                                                                                        |
| Van Dijk 1995  | Cross sectional | No exposure data, joint disease in female ballet dancers                                                                                                    |
| Vingard 1998   | Case control    | See Vingard 1997b: included in this analysis                                                                                                                |
| Vingard 1993   | Case control    | Exposures due to sports (recreational or professional) rather than “standard” occupations, no occupational exposure. Same study group like Vingard 1991.    |
| Xiao 2013      | Cross sectional | No data on coxarthrosis.                                                                                                                                    |

This list is not exhaustive.

## References of excluded studies

- Akesson I, Johnsson B, Rylander L, Moritz U, Skerfving S. Musculoskeletal disorders among female dental personnel--clinical examination and a 5-year follow-up study of symptoms. *International archives of occupational and environmental health*. 1999;72(6):395-403. <https://www.ncbi.nlm.nih.gov/pubmed/10473839>
- Andrianakos AA, Kontelis LK, Karamitsos DG, Aslanidis SI, Georgountzos AI, Kaziolas GO, et al. Prevalence of symptomatic knee, hand, and hip osteoarthritis in Greece. The ESORDIG study. *J Rheumatol*. 2006;33(12):2507-13. <https://www.ncbi.nlm.nih.gov/pubmed/17143985>
- Bieleman HJ, van Ittersum MW, Groothoff JW, Oostveen JC, Oosterveld FG, van der Schans CP, et al. Functional capacity of people with early osteoarthritis: a comparison between subjects from the cohort hip and cohort knee (CHECK) and healthy ageing workers. *International archives of occupational and environmental health*. 2010;83(8):913-21. <https://www.ncbi.nlm.nih.gov/pubmed/20490537>
- Cho HJ, Morey V, Kang JY, Kim KW, Kim TK. Prevalence and Risk Factors of Spine, Shoulder, Hand, Hip, and Knee Osteoarthritis in Community-dwelling Koreans Older Than Age 65 Years. *Clin Orthop Relat Res*. 2015;473(10):3307-14. <https://www.ncbi.nlm.nih.gov/pubmed/26162413>
- Cleveland RJ, Schwartz TA, Prizer LP, Randolph R, Schoster B, Renner JB, et al. Associations of educational attainment, occupation, and community poverty with hip osteoarthritis. *Arthritis Care Res (Hoboken)*. 2013;65(6):954-61. <https://www.ncbi.nlm.nih.gov/pubmed/23225374>
- Cooper C, Inskip H, Croft P, Campbell L, Smith G, McLaren M, et al. Individual risk factors for hip osteoarthritis: obesity, hip injury, and physical activity. *Am J Epidemiol*. 1998;147(6):516-22. <https://www.ncbi.nlm.nih.gov/pubmed/9521177>
- Cumming RG, Klineberg RJ. Epidemiological study of the relation between arthritis of the hip and hip fractures. *Ann Rheum Dis*. 1993;52(10):707-10. <https://www.ncbi.nlm.nih.gov/pubmed/8257206>
- Cunningham RJ. Farmer's hip. *BMJ*. 1992;305(6845):118-9. <https://www.ncbi.nlm.nih.gov/pubmed/1638242>
- Dahaghin S, Bierma-Zeinstra SM, Reijman M, Pols HA, Hazes JM, Koes BW. Does hand osteoarthritis predict future hip or knee osteoarthritis? *Arthritis Rheum*. 2005;52(11):3520-7. <https://www.ncbi.nlm.nih.gov/pubmed/16255023>
- de Zwart BC, Broersen JP, Frings-Dresen MH, van Dijk FJ. Repeated survey on changes in musculoskeletal complaints relative to age and work demands. *Occupational and environmental medicine*. 1997;54(11):793-9. <https://www.ncbi.nlm.nih.gov/pubmed/9538351>
- Drawer S, Fuller CW. Propensity for osteoarthritis and lower limb joint pain in retired professional soccer players. *Br J Sports Med*. 2001;35(6):402-8. <https://www.ncbi.nlm.nih.gov/pubmed/11726474>
- Goekoop RJ, Kloppenburg M, Kroon HM, Dirkse LE, Huizinga TW, Westendorp RG, et al. Determinants of absence of osteoarthritis in old age. *Scand J Rheumatol*. 2011;40(1):68-73. <https://www.ncbi.nlm.nih.gov/pubmed/20919944>

Gomez MI, Hwang S, Stark AD, May JJ, Hallman EM, Pantea CI. An analysis of self-reported joint pain among New York farmers. *J Agric Saf Health*. 2003;9(2):143-57.  
<https://www.ncbi.nlm.nih.gov/pubmed/12827860>

Gouttebauge V, Inklaar H, Backx F, Kerkhoffs G. Prevalence of osteoarthritis in former elite athletes: a systematic overview of the recent literature. *Rheumatol Int*. 2015;35(3):405-18.  
<https://www.ncbi.nlm.nih.gov/pubmed/25037899>

Holmberg S, Stiernstrom EL, Thelin A, Svardsudd K. Musculoskeletal symptoms among farmers and non-farmers: a population-based study. *Int J Occup Environ Health*. 2002;8(4):339-45.  
<https://www.ncbi.nlm.nih.gov/pubmed/12412852>

Jacobsen S, Sonne-Holm S, Soballe K, Gebuhr P, Lund B. Factors influencing hip joint space in asymptomatic subjects. A survey of 4151 subjects of the Copenhagen City Heart Study: the Osteoarthritis Substudy. *Osteoarthritis Cartilage*. 2004b;12(9):698-703.  
<https://www.ncbi.nlm.nih.gov/pubmed/15325635>

Jacobsen S, Sonne-Holm S, Soballe K, Gebuhr P, Lund B. Hip dysplasia and osteoarthrosis: a survey of 4151 subjects from the Osteoarthrosis Substudy of the Copenhagen City Heart Study. *Acta Orthop*. 2005a;76(2):149-58. <https://www.ncbi.nlm.nih.gov/pubmed/16097538>

Jacobsen S, Sonne-Holm S, Soballe K, Gebuhr P, Lund B. Joint space width in dysplasia of the hip: a case-control study of 81 adults followed for ten years. *J Bone Joint Surg Br*. 2005b;87(4):471-7.  
<https://www.ncbi.nlm.nih.gov/pubmed/15795195>

Jacobsson B, Dalen N, Tjornstrand B. Coxarthrosis and labour. *Int Orthop*. 1987;11(4):311-3.  
<https://www.ncbi.nlm.nih.gov/pubmed/3440647>

Järvholm B, From C, Lewold S, Malchau H, Vingard E. Incidence of surgically treated osteoarthritis in the hip and knee in male construction workers. *Occupational and environmental medicine*. 2008;65(4):275-8. <https://www.ncbi.nlm.nih.gov/pubmed/17928390>

Juhakoski R, Tenhonen S, Anttonen T, Kauppinen T, Arokoski JP. Factors affecting self-reported pain and physical function in patients with hip osteoarthritis. *Arch Phys Med Rehabil*. 2008;89(6):1066-73.  
<https://www.ncbi.nlm.nih.gov/pubmed/18503801>

Keskimäki I, Salinto M, Aro S. Private medicine and socioeconomic differences in the rates of common surgical procedures in Finland. *Health Policy*. 1996;36(3):245-59.  
<https://www.ncbi.nlm.nih.gov/pubmed/10172662>

Kettunen JA, Kujala UM, Kaprio J, Koskenvuo M, Sarna S. Lower-limb function among former elite male athletes. *Am J Sports Med*. 2001;29(1):2-8. <https://www.ncbi.nlm.nih.gov/pubmed/11206251>

Kim C, Linsenmeyer KD, Vlad SC, Guermazi A, Clancy MM, Niu J, et al. Prevalence of radiographic and symptomatic hip osteoarthritis in an urban United States community: the Framingham osteoarthritis study. *Arthritis Rheumatol*. 2014;66(11):3013-7. <https://www.ncbi.nlm.nih.gov/pubmed/25103598>

Kujala UM, Kaprio J, Sarna S. Osteoarthritis of weight bearing joints of lower limbs in former elite male athletes. *BMJ*. 1994;308(6923):231-4. <https://www.ncbi.nlm.nih.gov/pubmed/8111258>

Lau EC, Cooper C, Lam D, Chan VN, Tsang KK, Sham A. Factors associated with osteoarthritis of the hip and knee in Hong Kong Chinese: obesity, joint injury, and occupational activities. *Am J Epidemiol*. 2000;152(9):855-62. <https://www.ncbi.nlm.nih.gov/pubmed/11085397>

- Lawrence JS, Molyneux MK, Dingwall-Fordyce I. Rheumatism in foundry workers. *Br J Ind Med*. 1966;23(1):42-52. <https://www.ncbi.nlm.nih.gov/pubmed/5295324>
- Lemasters GK, Atterbury MR, Booth-Jones AD, Bhattacharya A, Ollila-Glenn N, Forrester C, et al. Prevalence of work related musculoskeletal disorders in active union carpenters. *Occupational and environmental medicine*. 1998;55(6):421-7. <https://www.ncbi.nlm.nih.gov/pubmed/9764103>
- Lindberg H, Danielsson LG. The relation between labor and coxarthrosis. *Clin Orthop Relat Res*. 1984(191):159-61. <https://www.ncbi.nlm.nih.gov/pubmed/6499306>
- Litwic A, Edwards MH, Dennison EM, Cooper C. Epidemiology and burden of osteoarthritis. *Br Med Bull*. 2013;105:185-99. <https://www.ncbi.nlm.nih.gov/pubmed/23337796>
- Marti B, Knobloch M, Tschopp A, Jucker A, Howald H. Is excessive running predictive of degenerative hip disease? Controlled study of former elite athletes. *BMJ*. 1989;299(6691):91-3. <https://www.ncbi.nlm.nih.gov/pubmed/2504343>
- Olsen O, Vingard E, Koster M, Alfredsson L. Etiologic fractions for physical work load, sports and overweight in the occurrence of coxarthrosis. *Scand J Work Environ Health*. 1994;20(3):184-8. <https://www.ncbi.nlm.nih.gov/pubmed/7973490>
- Rapala K, Truszczyńska A, Tarnowski A. Total hip arthroplasty in the treatment of degenerative disorders in rural and urban patients - A retrospective, randomised and controlled study. *Annals of agricultural and environmental medicine : AAEM*. 2015;22(1):102-5. <https://www.ncbi.nlm.nih.gov/pubmed/25780837>
- Reijman M, Hazes JM, Pols HA, Bernsen RM, Koes BW, Bierma-Zeinstra SM. Role of radiography in predicting progression of osteoarthritis of the hip: prospective cohort study. *BMJ*. 2005;330(7501):1183. <https://www.ncbi.nlm.nih.gov/pubmed/15894555>
- Rossignol M, Leclerc A, Allaert FA, Rozenberg S, Valat JP, Avouac B, et al. Primary osteoarthritis of hip, knee, and hand in relation to occupational exposure. *Occupational and environmental medicine*. 2005;62(11):772-7. <https://www.ncbi.nlm.nih.gov/pubmed/16234403>
- Rossignol M, Leclerc A, Hilliquin P, Allaert FA, Rozenberg S, Valat JP, et al. Primary osteoarthritis and occupations: a national cross sectional survey of 10 412 symptomatic patients. *Occupational and environmental medicine*. 2003;60(11):882-6. <https://www.ncbi.nlm.nih.gov/pubmed/14573720>
- Sandmark H. Musculoskeletal dysfunction in physical education teachers. *Occupational and environmental medicine*. 2000;57(10):673-7. <https://www.ncbi.nlm.nih.gov/pubmed/10984339>
- Schmitt H, Brocai DR, Lukoschek M. High prevalence of hip arthrosis in former elite javelin throwers and high jumpers: 41 athletes examined more than 10 years after retirement from competitive sports. *Acta Orthop Scand*. 2004;75(1):34-9. <https://www.ncbi.nlm.nih.gov/pubmed/15022803>
- Schmitt H, Rohs C, Schneider S, Clarius M. [Is competitive running associated with osteoarthritis of the hip or the knee?]. *Orthopäde*. 2006;35(10):1087-92. <https://www.ncbi.nlm.nih.gov/pubmed/16932832>
- Seok H, Choi SJ, Yoon JH, Song GG, Won JU, Kim JH, et al. The Association between Osteoarthritis and Occupational Clusters in the Korean Population: A Nationwide Study. *PloS one*. 2017;12(1):e0170229. <https://www.ncbi.nlm.nih.gov/pubmed/28099527>

Shepard GJ, Banks AJ, Ryan WG. Ex-professional association footballers have an increased prevalence of osteoarthritis of the hip compared with age matched controls despite not having sustained notable hip injuries. *Br J Sports Med.* 2003;37(1):80-1.  
<https://www.ncbi.nlm.nih.gov/pubmed/12547750>

Sobti A, Cooper C, Inskip H, Searle S, Coggon D. Occupational physical activity and long-term risk of musculoskeletal symptoms: a national survey of post office pensioners. *Am J Ind Med.* 1997;32(1):76-83. <https://www.ncbi.nlm.nih.gov/pubmed/9131214>

Teichtahl AJ, Smith S, Wang Y, Wluka AE, O'Sullivan R, Giles GG, et al. Occupational risk factors for hip osteoarthritis are associated with early hip structural abnormalities: a 3.0 T magnetic resonance imaging study of community-based adults. *Arthritis Res Ther.* 2015;17:19.  
<https://www.ncbi.nlm.nih.gov/pubmed/25627648>

Teitz CC, Kilcoyne RF. Premature osteoarthrosis in professional dancers. *Clin J Sport Med.* 1998;8(4):255-9. <https://www.ncbi.nlm.nih.gov/pubmed/9884788>

Tepper S, Hochberg MC. Factors associated with hip osteoarthritis: data from the First National Health and Nutrition Examination Survey (NHANES-I). *Am J Epidemiol.* 1993;137(10):1081-8.  
<https://www.ncbi.nlm.nih.gov/pubmed/8317437>

Toren A, Oberg K, Lembke B, Enlund K, Rask-Andersen A. Tractor-driving hours and their relation to self-reported low-back and hip symptoms. *Appl Ergon.* 2002;33(2):139-46.  
<https://www.ncbi.nlm.nih.gov/pubmed/12009120>

Typpö T. Osteoarthritis of the hip. Radiologic findings and etiology. *Ann Chir Gynaecol Suppl.* 1985;201:1-38. <https://www.ncbi.nlm.nih.gov/pubmed/3911867>

van Dijk CN, Lim LS, Poortman A, Strubbe EH, Marti RK. Degenerative joint disease in female ballet dancers. *Am J Sports Med.* 1995;23(3):295-300. <https://www.ncbi.nlm.nih.gov/pubmed/7661255>

Vingard E, Alfredsson L, Goldie I, Hogstedt C. Sports and osteoarthrosis of the hip. An epidemiologic study. *Am J Sports Med.* 1993;21(2):195-200. <https://www.ncbi.nlm.nih.gov/pubmed/8465912>

Vingard E, Alfredsson L, Malchau H. Osteoarthrosis of the hip in women and its relationship to physical load from sports activities. *Am J Sports Med.* 1998;26(1):78-82.  
<https://www.ncbi.nlm.nih.gov/pubmed/9474406>

Xiao H, McCurdy SA, Stoecklin-Marais MT, Li CS, Schenker MB. Agricultural work and chronic musculoskeletal pain among Latino farm workers: the MICASA study. *Am J Ind Med.* 2013;56(2):216-25. <https://www.ncbi.nlm.nih.gov/pubmed/23023585>
