# Supplementary material for: Hip Osteoarthritis and Physical Workload: Influence of Study Quality on Risk Estimations—A Meta-Analysis of Epidemiological Findings
Source: MDPI journal article supplement (doi:10.3390/ijerph16030322), 2019-01-24

## File S4. Forest plots of all meta-analyses carried out for Table 6 (females)

### Heavy lifting/load handling and hip osteoarthritis among females (see Table 6)

#### a. All prevalence studies, female, n=4

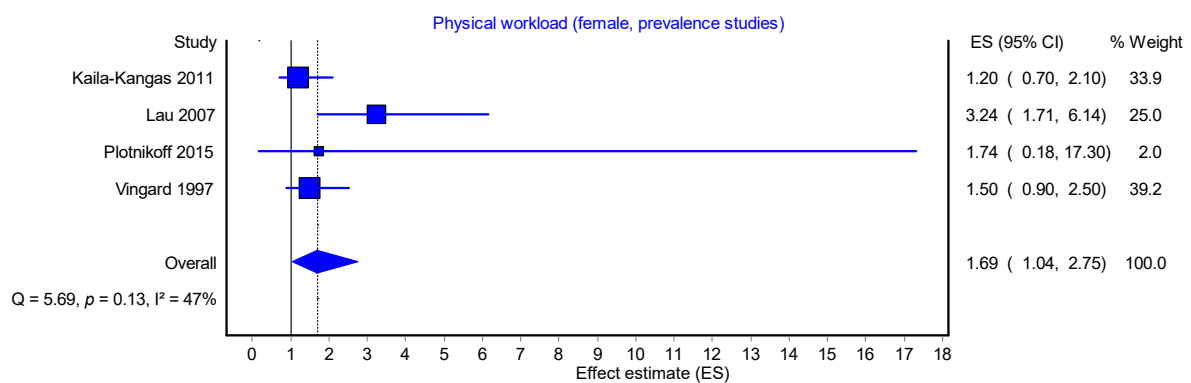

#### b. All prevalence studies, female, ExpoScore=all, DiagScore=3, n=3

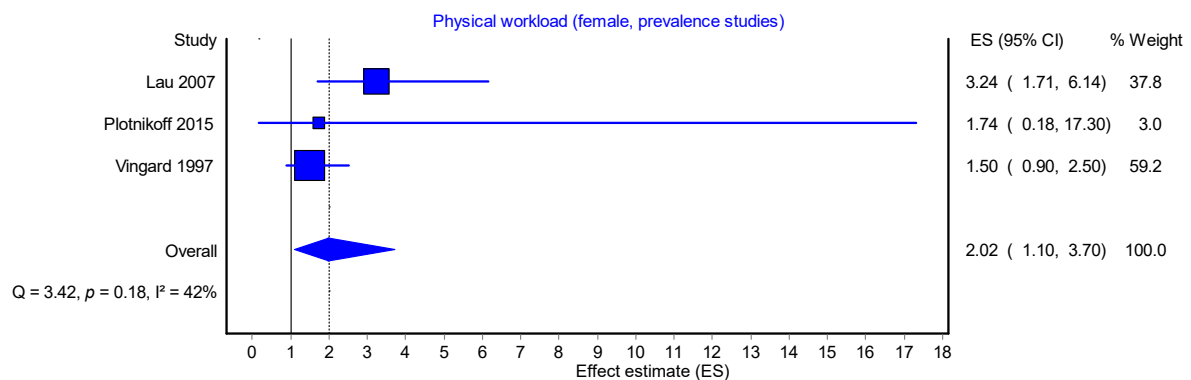

c. All prevalence studies, female, ExpoScore $\geq$ 3, DiagScore=all, n=3

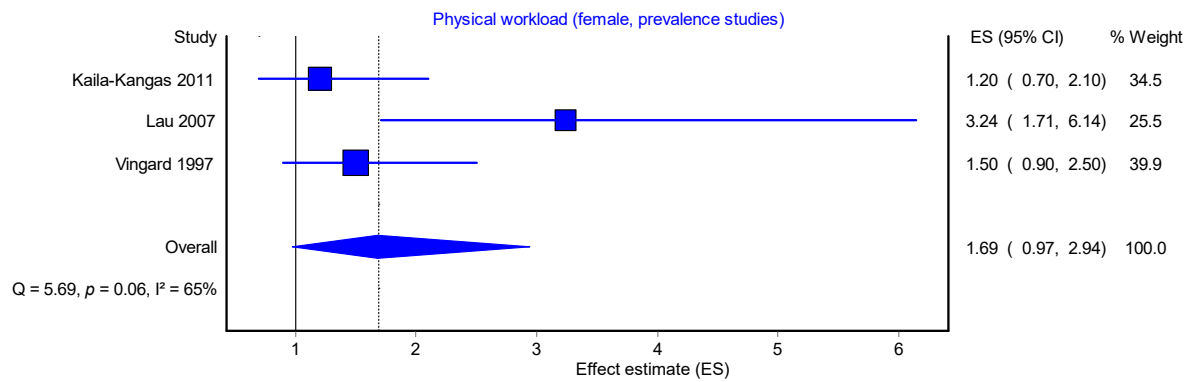

d. All prevalence studies, female, ExpoScore $\geq$ 3, DiagScore=3, n=2

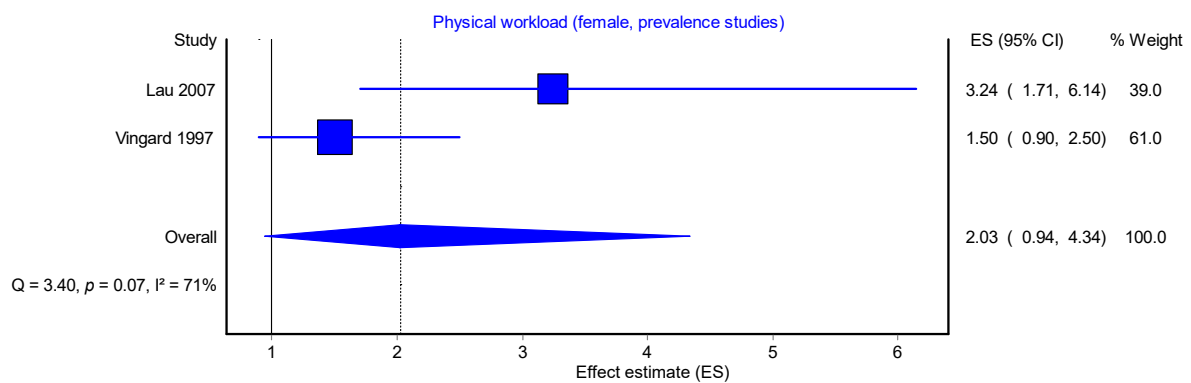

e. All cohort studies, female, n=3

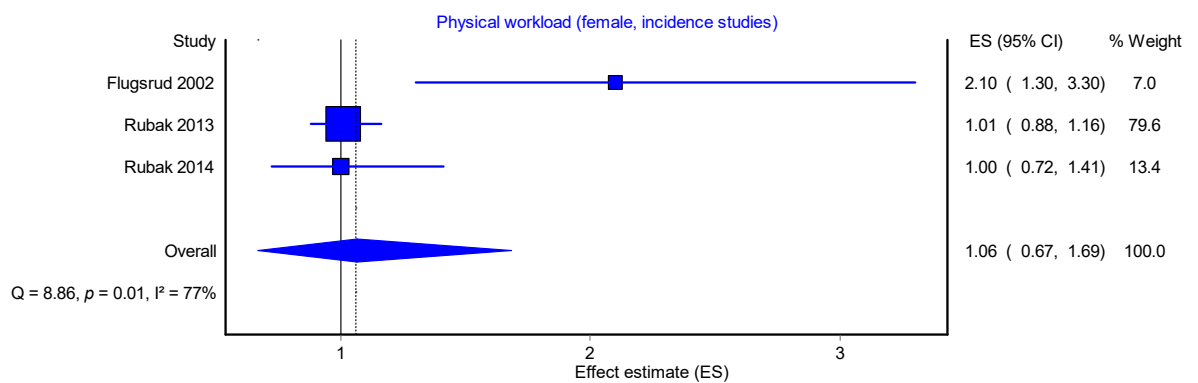

f. Cohort studies, female, ExpoScore=all, DiagScore=3, n=3

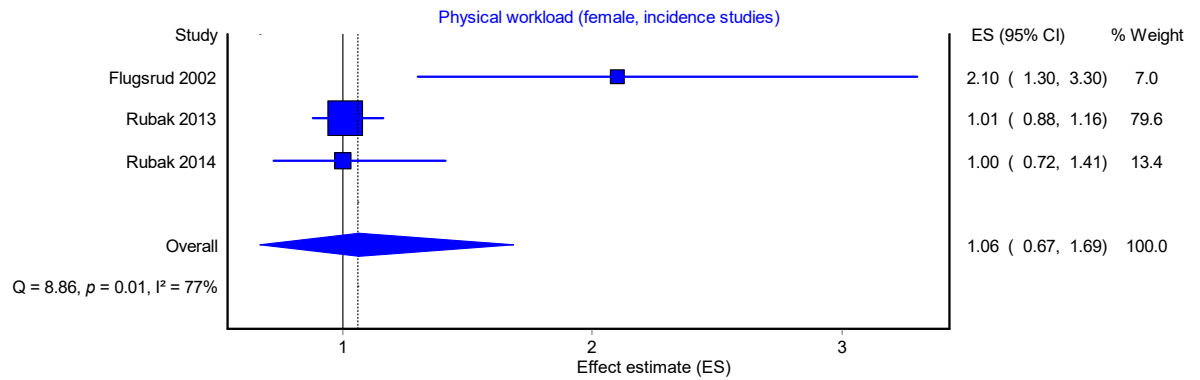

g. Cohort studies, female, ExpoScore $\geq$ 3, DiagScore=3, n=2

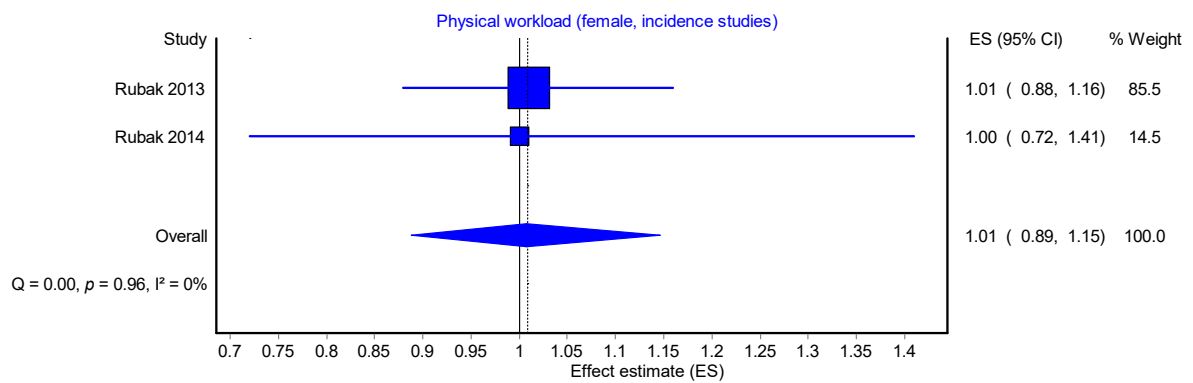

## Farming and hip osteoarthritis among females (see Table 6)

a. All cohort studies, female

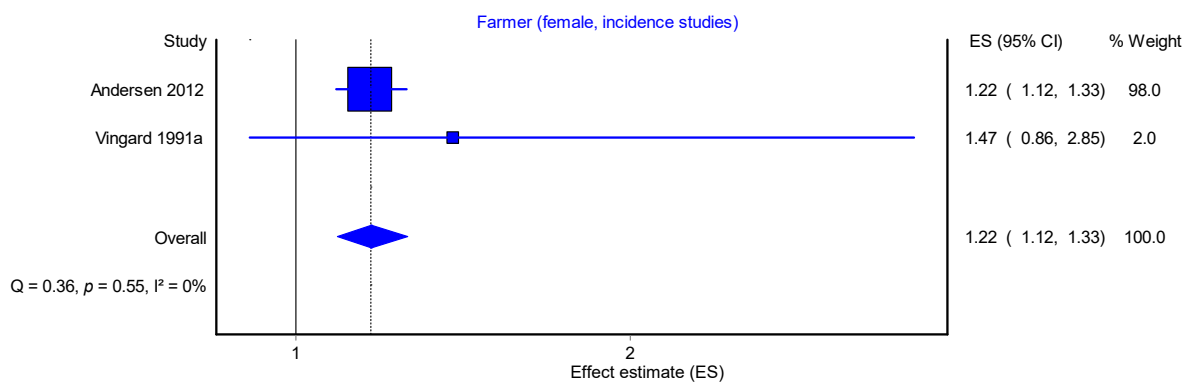

Supplement: s1 [file s1]
