# Supplementary material for: Hip Osteoarthritis and Physical Workload: Influence of Study Quality on Risk Estimations—A Meta-Analysis of Epidemiological Findings
Source: Int J Environ Res Public Health. 2019 Jan 24;16(3):322. doi: 10.3390/ijerph16030322 (PMC6388382; doi:10.3390/ijerph16030322)
Supplement: Supplementary file 1 [file ijerph-16-00322-s001.zip]

Archive with 6 entries (6 files):
- File S1.pdf
- File S2.pdf
- File S3.pdf
- File S4.pdf
- Table S1.pdf
- Table S2 PRISMA checklist.doc
